# Supplementary material for: Association Between Area-Level Socioeconomic Deprivation and Diabetes Care Quality in US Primary Care Practices
Source: PubMed Central journal article supplement (PMC8717098; doi:10.1001/jamanetworkopen.2021.38438), 2021-12-29
Supplement: jamanetwopen-e2138438-s001.pdf [file jamanetwopen-e2138438-s001.pdf]

## Supplementary Online Content

Kurani SS, Lampman MA, Funni SA, et al. Association between area-level socioeconomic deprivation and diabetes care quality in US primary care practices. *JAMA Netw Open*. 2021;4(12):e2138438. doi:10.1001/jamanetworkopen.2021.38438

**eTable.** American Community Survey 5-Year Estimates and Factor Score Coefficients

This supplementary material has been provided by the authors to give readers additional information about their work.

**eTable.** American Community Survey 5-Year Estimates and Factor Score Coefficients

| <b>US Census Indicator</b>                                      | <b>2012-2016 ACS Table Reference,<br/>5-year estimates</b> | <b>Factor Score Coefficient 2016</b> |
|-----------------------------------------------------------------|------------------------------------------------------------|--------------------------------------|
| Median family income                                            | B19013                                                     | -0.21740                             |
| Income disparity                                                | B19001                                                     | 0.05598                              |
| Families below poverty level                                    | B17010                                                     | 0.11151                              |
| % population below 150% poverty threshold                       | C17002                                                     | 0.22992                              |
| Single parent household with dependents <18                     | B23008                                                     | 0.04159                              |
| Households without a motor vehicle                              | B25044                                                     | 0.04491                              |
| Households without a telephone                                  | B25043                                                     | 0.01567                              |
| Occupied housing units without complete plumbing                | B25016                                                     | 0.01140                              |
| Owner occupied housing units                                    | B25003                                                     | -0.05758                             |
| Households with >1 person per room                              | B25014                                                     | 0.01835                              |
| Median monthly mortgage                                         | B25088                                                     | -0.10626                             |
| Median gross rent                                               | B25064                                                     | -0.04952                             |
| Median home value                                               | B25077                                                     | -0.08486                             |
| Employed persons $\geq 16$ in white collar occupation           | C24010                                                     | -0.05700                             |
| Civilian labor force unemployed (aged $\geq 16$ )               | B23025                                                     | 0.02541                              |
| Population aged $\geq 25$ with <9yr education                   | B15003                                                     | 0.06044                              |
| Population aged $\geq 25$ with at least a high school education | B15003                                                     | -0.19303                             |
